# Supplementary material for: NF-κB p65 directs sex-specific neuroprotection in human neurons
Source: PubMed Central journal article supplement (PMC6207661; doi:10.1038/s41598-018-34394-8), 2018-10-30

## Supplementary information

### NF- $\kappa$ B p65 directs sex-specific neuroprotection in human neurons

Lucia M Ruiz-Perera<sup>1</sup>, Lennart Schneider<sup>1</sup>, Beatrice A Windmüller<sup>1</sup>, Janine Müller<sup>1</sup>, Johannes FW Greiner<sup>2</sup>, Christian Kaltschmidt<sup>2</sup> and Barbara Kaltschmidt<sup>1,2\*</sup>

**Supplementary Table S1:** Primer sequences for real-time polymerase chain reaction.

| Target                                                                        | Sequence 5'-3'         |
|-------------------------------------------------------------------------------|------------------------|
| IGF1 ( Insulin-like growth factor 1)                                          | GAAGATGCACACCATGTCCT   |
| Rev- IGF1                                                                     | TAAAAGCCCCTGTCTCCACA   |
| IGF2 ( Insulin-like growth factor 2)                                          | TGGACTTGAGTCCCTGAACC   |
| Rev- IGF2                                                                     | GATGGCCAGTTTACCCTGAA   |
| PKAcata $\alpha$ (c-AMP-dependent protein kinase catalytic subunit $\alpha$ ) | TACAACAAGGCCGTGGACTG   |
| Rev- PKAcata $\alpha$                                                         | AGATCTGGATGGGCTGGTCT   |
| SOD2 (Superoxide dismutase 2)                                                 | TGGAAGCCATCAAACGTGACT  |
| Rev- SOD2                                                                     | TTGAAACCAAGCCAACCCCA   |
| cIAP1 (Cellular inhibitor of apoptosis protein 1)                             | CCACTGGAGAAGAAAATGCTG  |
| Rev- c-IAP1                                                                   | CCAAGGCAGATTTAACCACA   |
| c-IAP2 (Cellular inhibitor of apoptosis protein 2)                            | GACAGCCCAGGAGATGAA AA  |
| Rev- c-IAP2                                                                   | CACGGCAGCATTAAATCACAG  |
| RPLP0 (Ribosomal Protein Lateral Stalk Subunit P0)                            | TGGGCAAGAACACCATGATG   |
| Rev-RPLP0                                                                     | AGTTTCTCCAGAGCTGGGTTGT |
| $\beta$ -actin (beta actin)                                                   | TCCCTGGAGAAGAGCTACGA   |
| Rev- $\beta$ -actin                                                           | AGCACTGTGTTGGCGTACAG   |

### Supplementary Figure 1

Full-length figures of gels showing the RT-PCR of differentiated ITSCs. The grouped gels in Fig. 1k were cropped from different parts of the same gel or from different gels as depicted here. In particular, mRNA levels were analysed for Nestin, MAP-2, Synaptophysin, AMPA receptor subunit 1, NMDA Receptor subunit 1, vesicular glutamate transporter 1, and glutamate metabotropic receptor 1 after neuronal differentiation. RPLP0, GAPDH and eEF2 served as housekeeping genes. NTC: non-template-control. The first 4 figures show gels ran in parallel on the same experiment, the last two gels also ran in parallel. For the last gels, two donors were shown after 0 and 30 days of differentiation respectively.

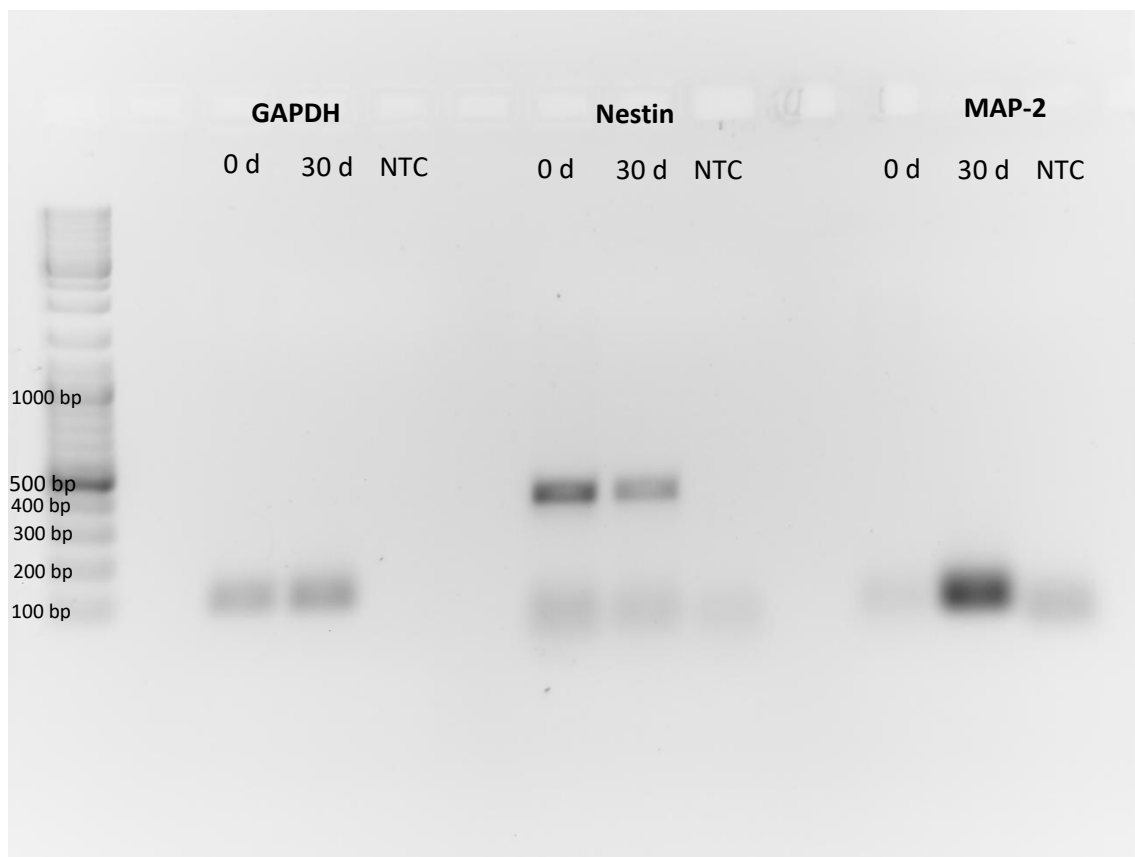

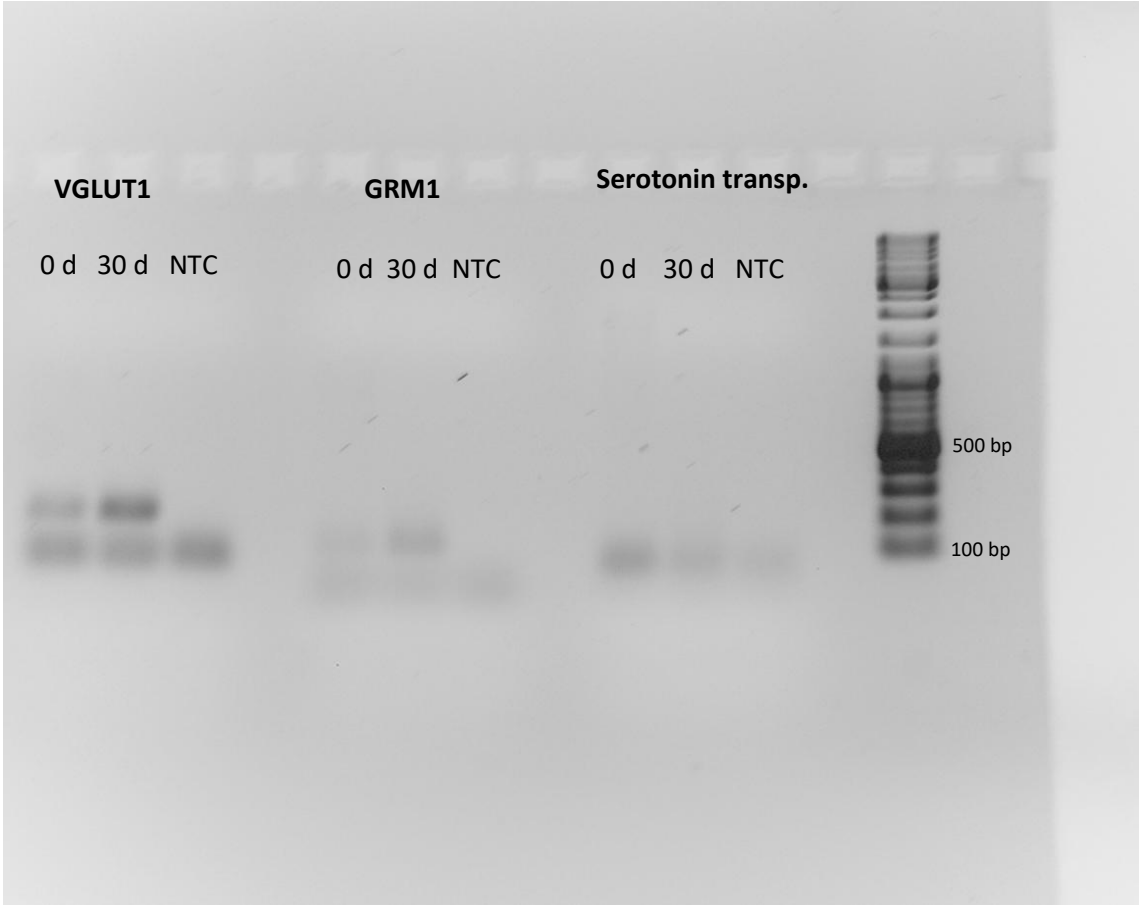

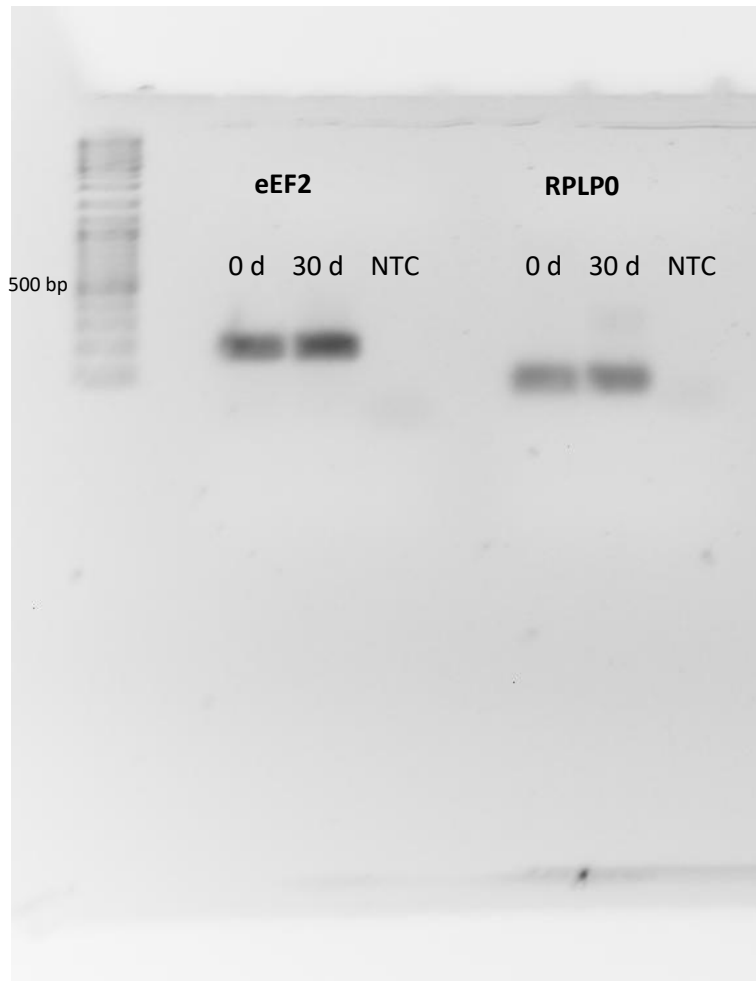

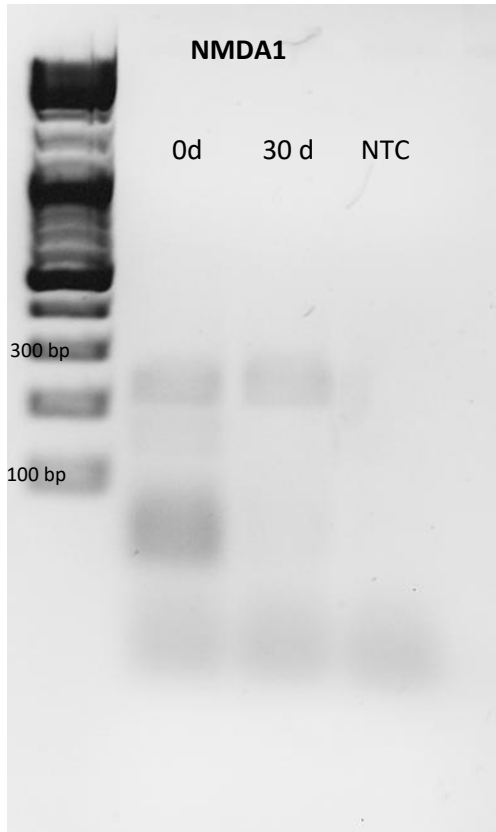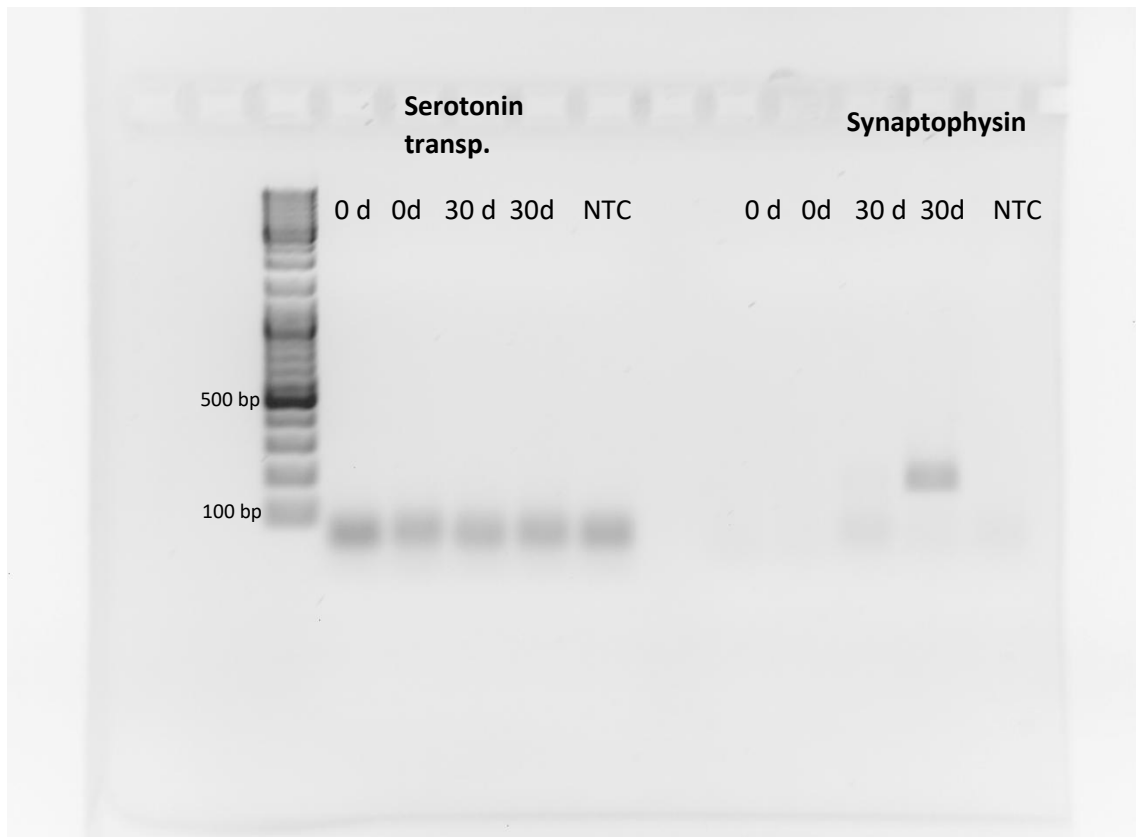

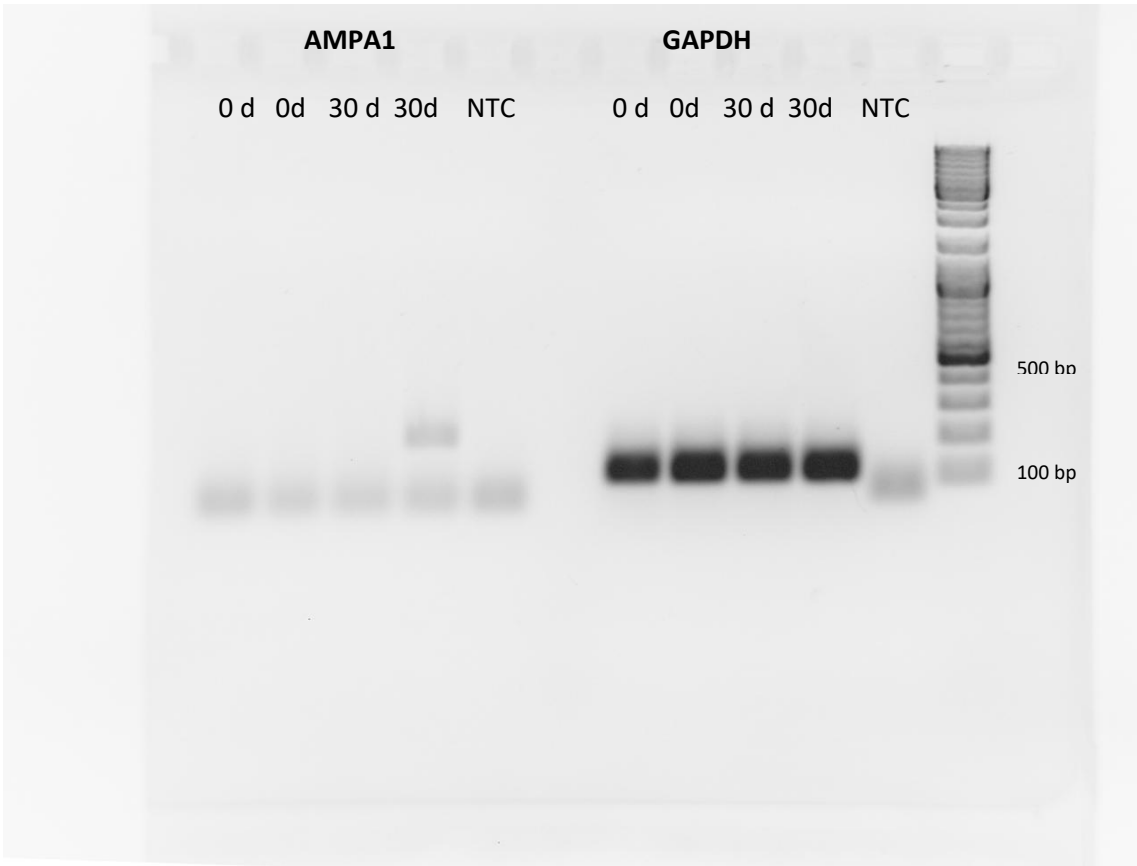

Supplement: 41598_2018_34394_MOESM1_ESM.pdf [file 41598_2018_34394_MOESM1_ESM.pdf]
